# Supplementary material for: Real-World Contribution of Electrification and Replacement Scenarios to the Fleet Emissions in West Midland Boroughs, UK
Source: Preprints.org preprint supplement (doi:10.20944/preprints202101.0299.v1), 2021-01-15
Supplement: Supplementary file 1 [file supplementary]

***“Supplementary Material”***

**Real-world contribution of electrification and renovation scenarios to the fleet emissions in West Midland boroughs, UK**

Louisa K. Osei, Omid Ghaffarpasand, and Francis D. Pope[[1]](#footnote-1)

School of Geography, Earth, and Environmental Sciences, University of Birmingham, Birmingham, UK

**Motorway Roads**

| 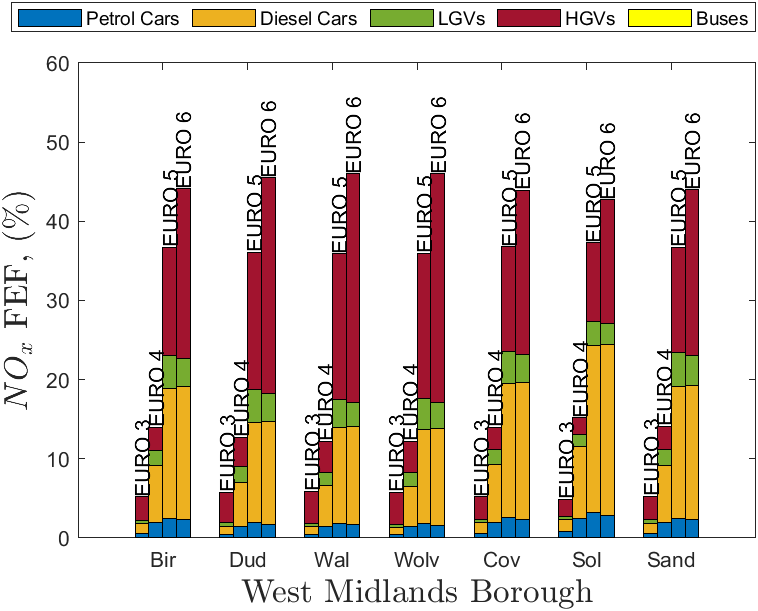   1. NOx | 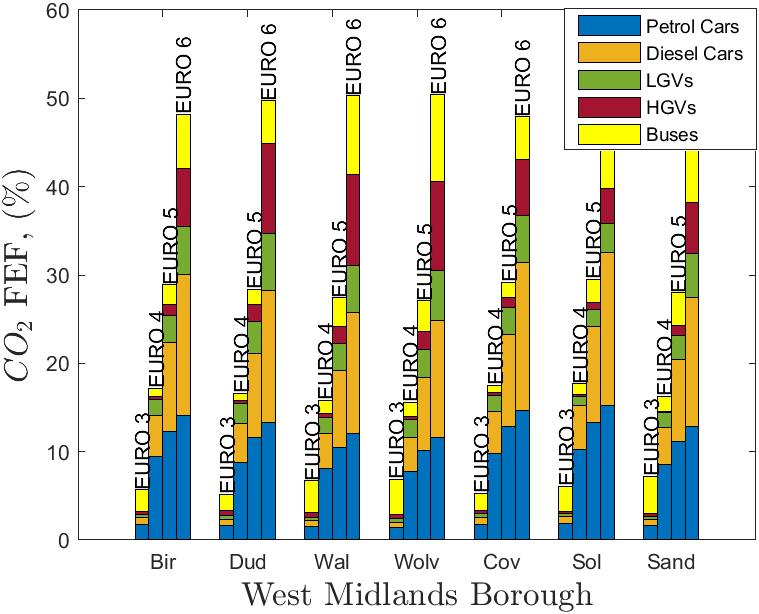 |
| --- | --- |
| 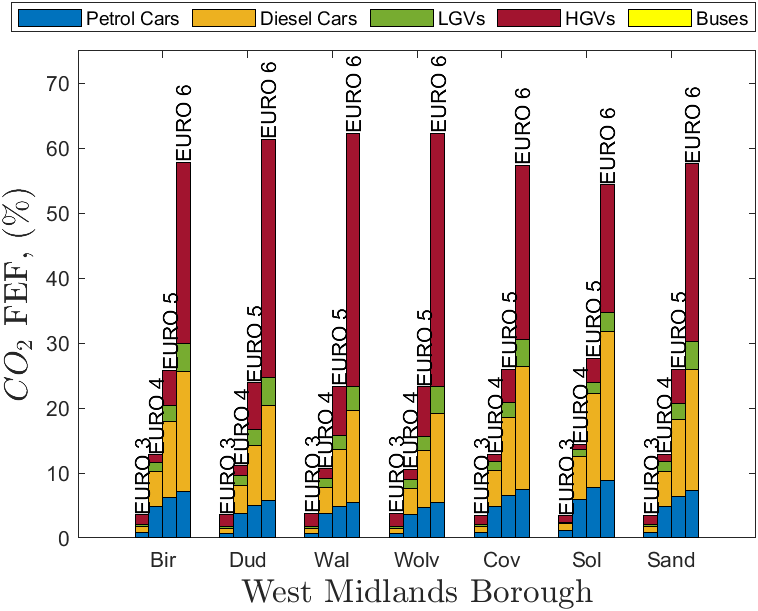   1. CO2 | 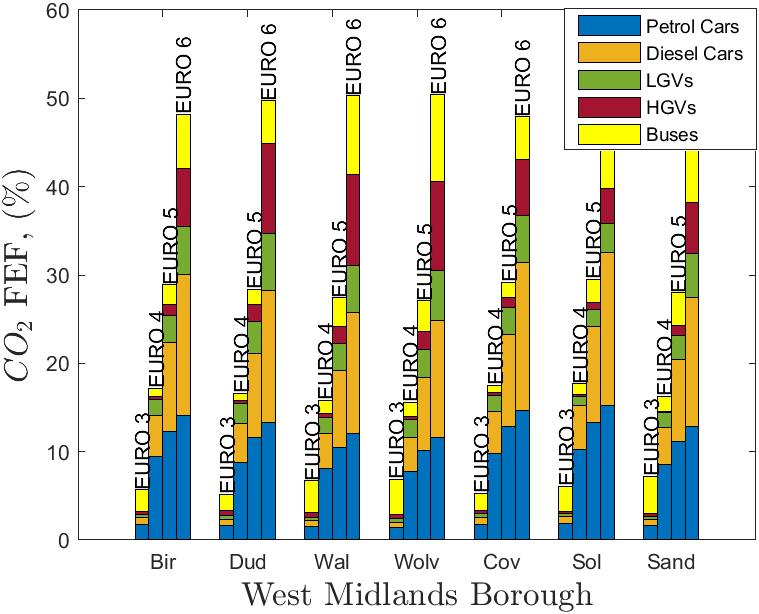 |
| 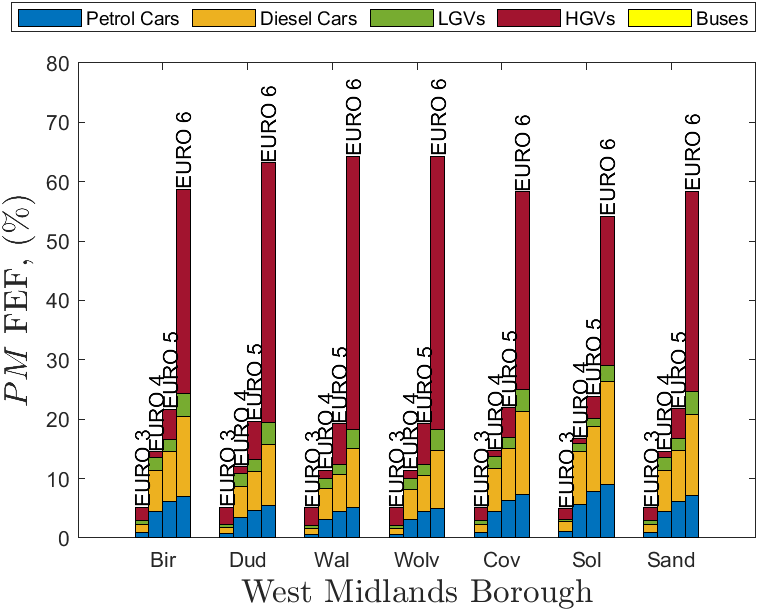   1. PM | 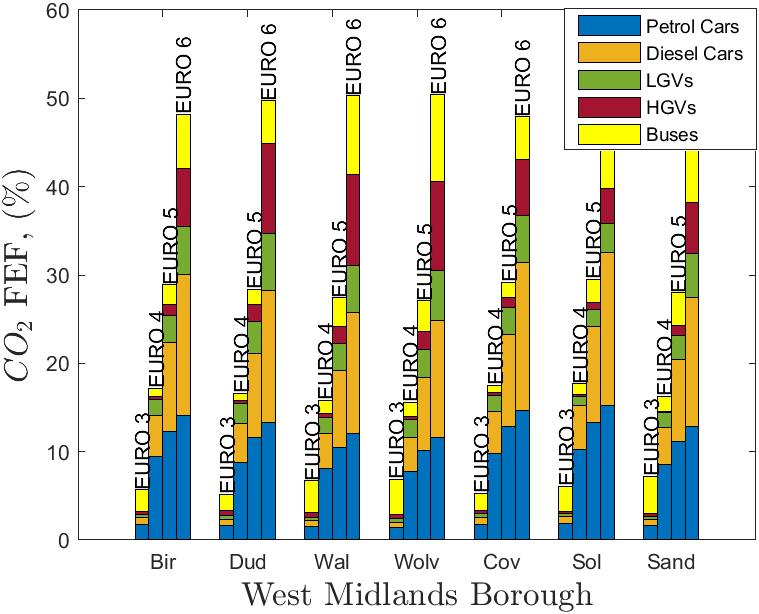 |
| Figure S1. The effect of fleet electrification on motorway emissions of (a) NOx, (b) CO2, and (c) PM in West Midlands boroughs. In the y-axis, (%) is based on the total fleet emission. | |

| 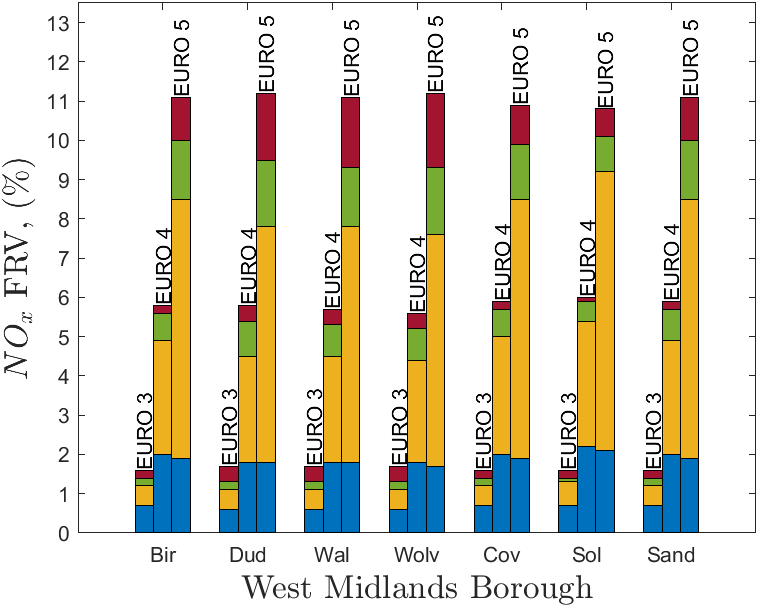   1. NOx | 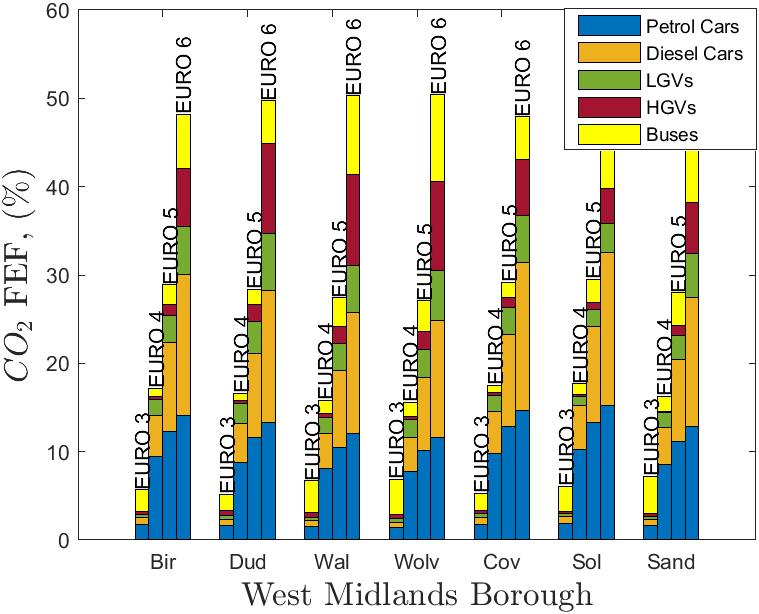 |
| --- | --- |
| 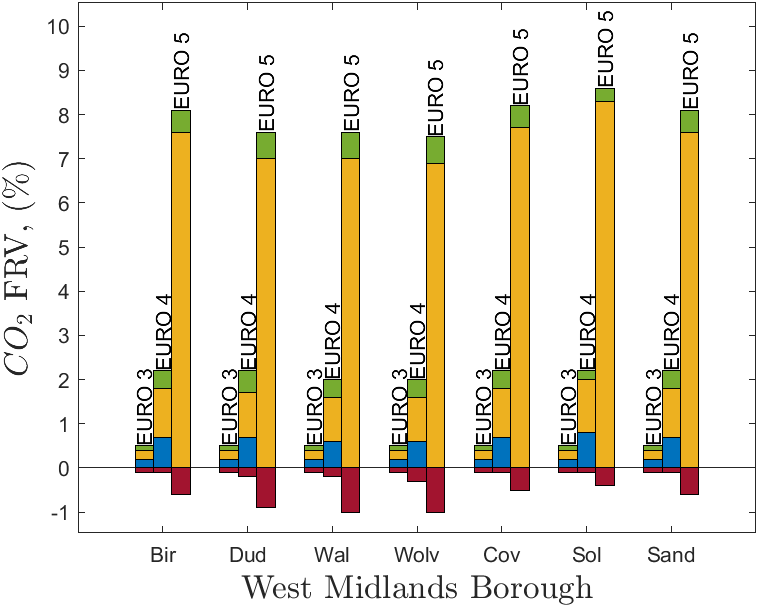   1. CO2 | 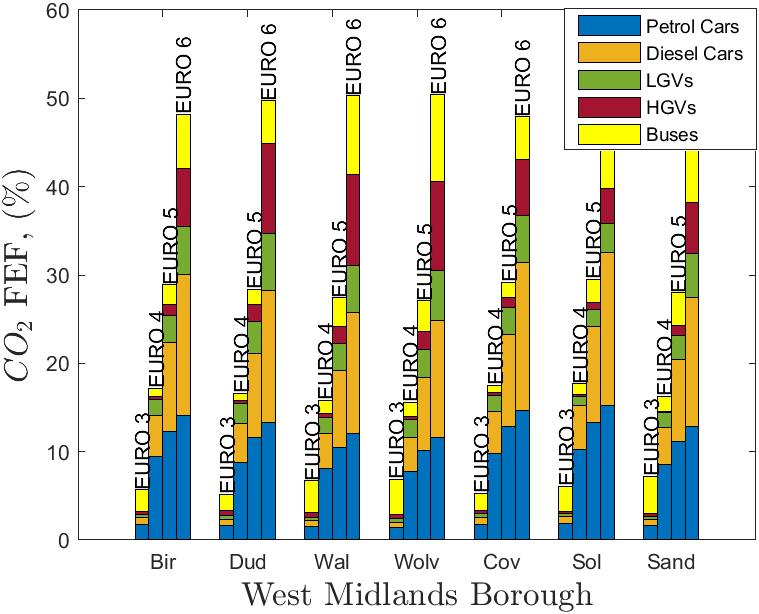 |
| 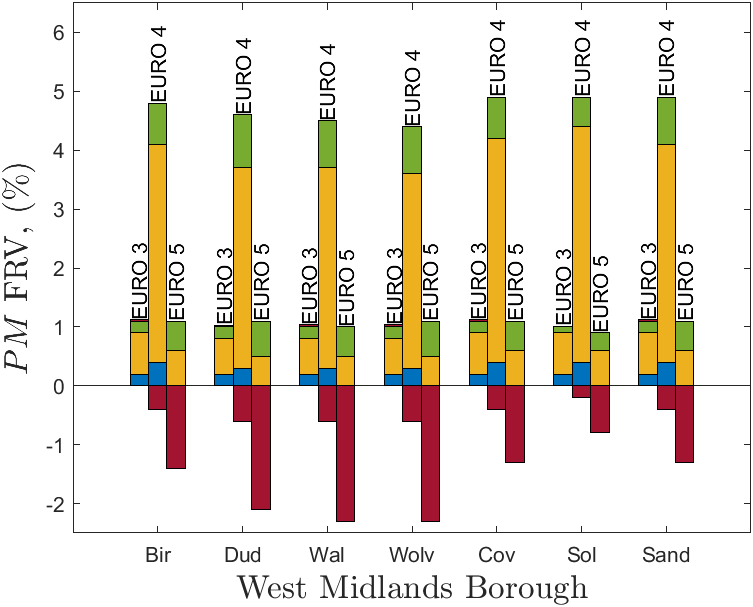   1. PM | 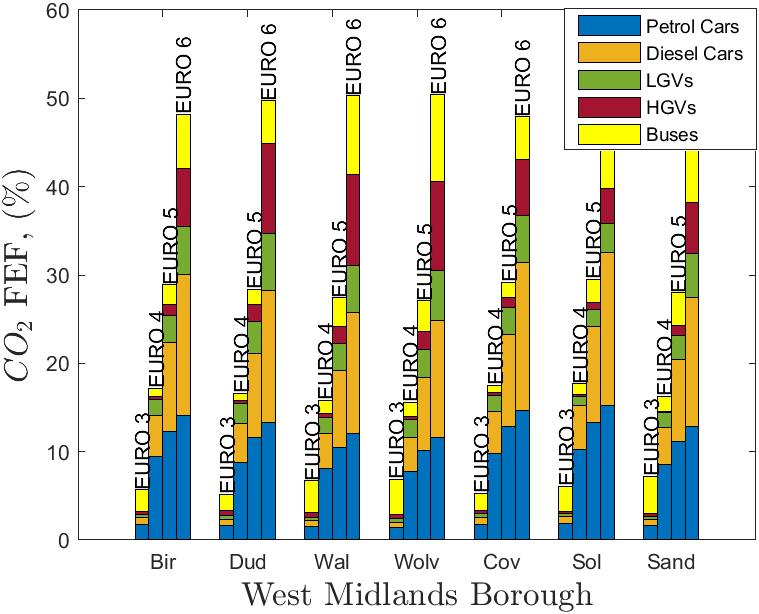 |
| Figure S2. The effect of fleet renovation on motorway emissions of (a) NOx, (b) CO2, and (c) PM in West Midlands boroughs. In the y-axis, (%) is based on the total fleet emission. | |

**Rural Roads**

| 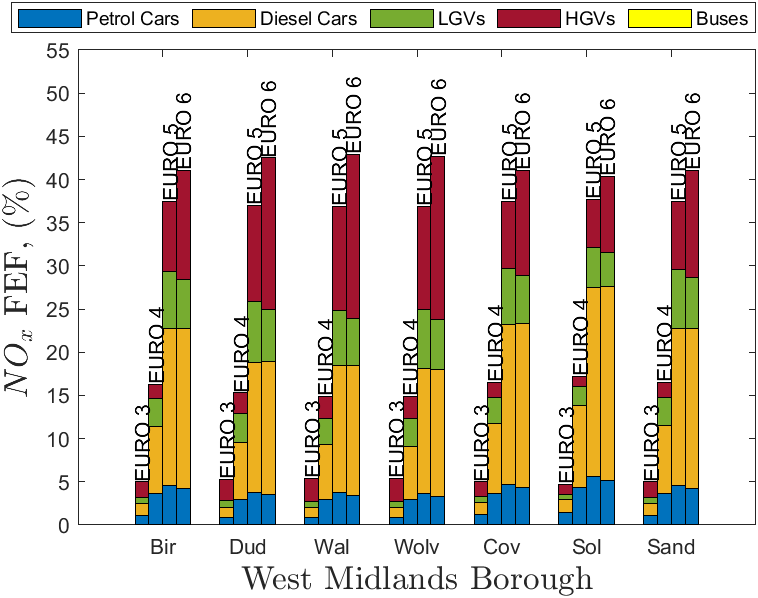   1. NOx | 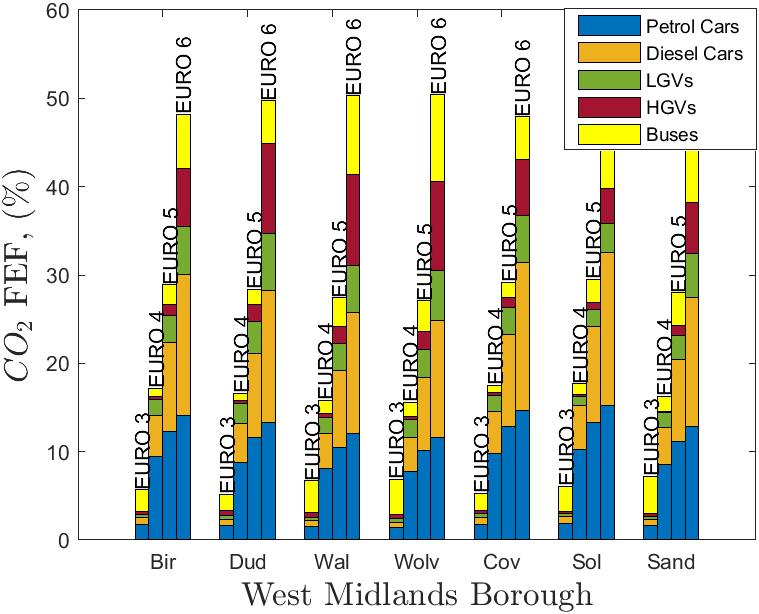 |
| --- | --- |
| 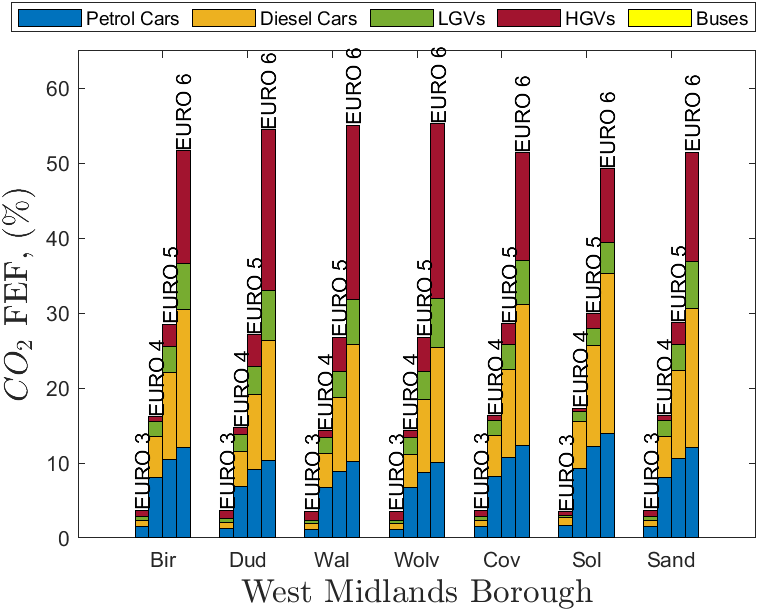   1. CO2 | 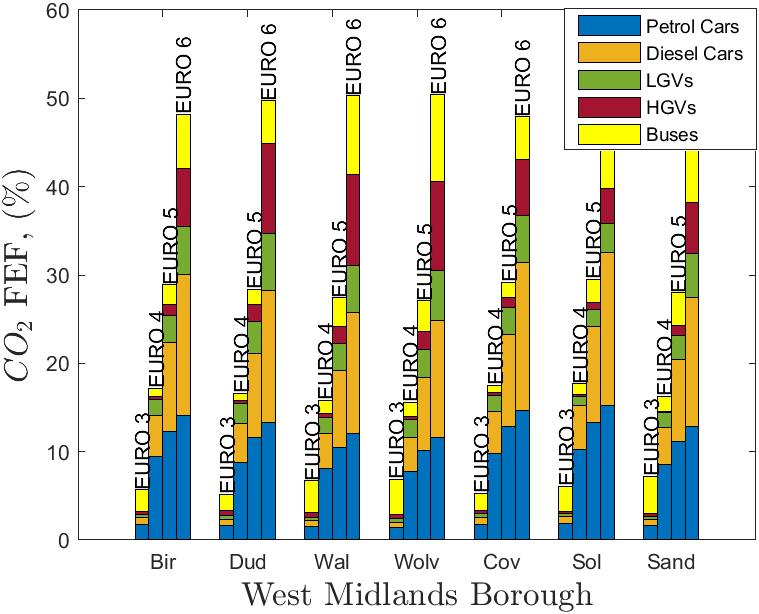 |
| 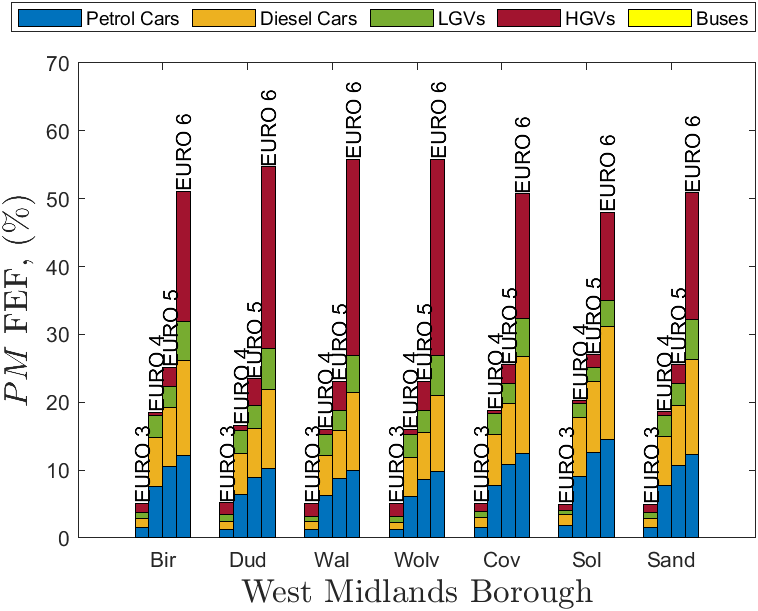   1. PM | 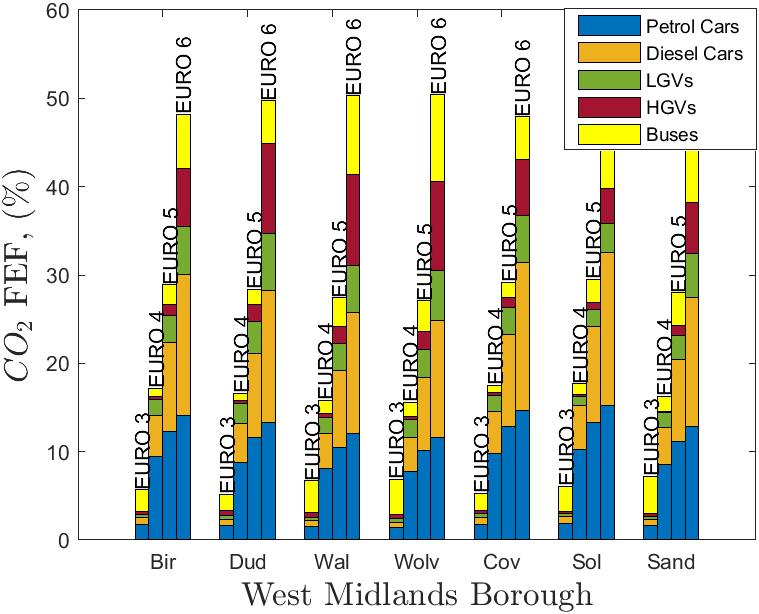 |
| Figure S3. The effect of fleet electrification on rural road emissions of (a) NOx, (b) CO2, and (c) PM in West Midlands boroughs. In the y-axis, (%) is based on the total fleet emission. | |

| 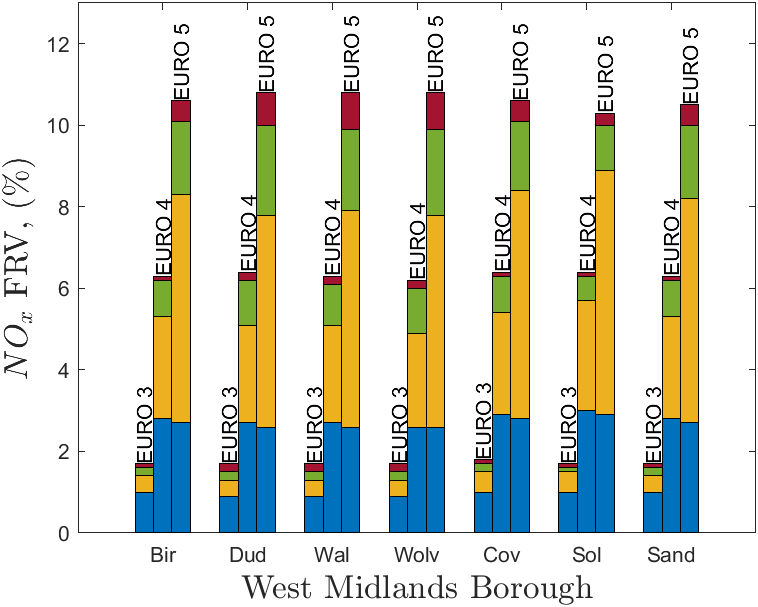   1. NOx | 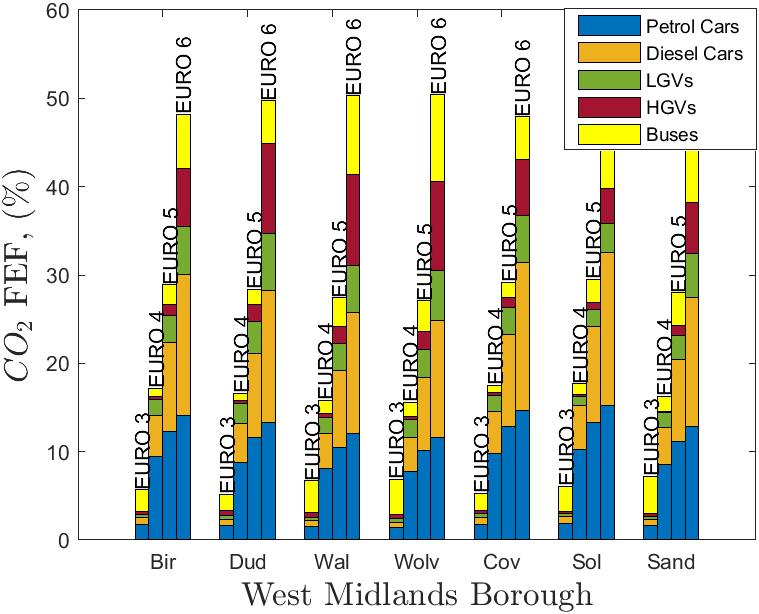 |
| --- | --- |
| 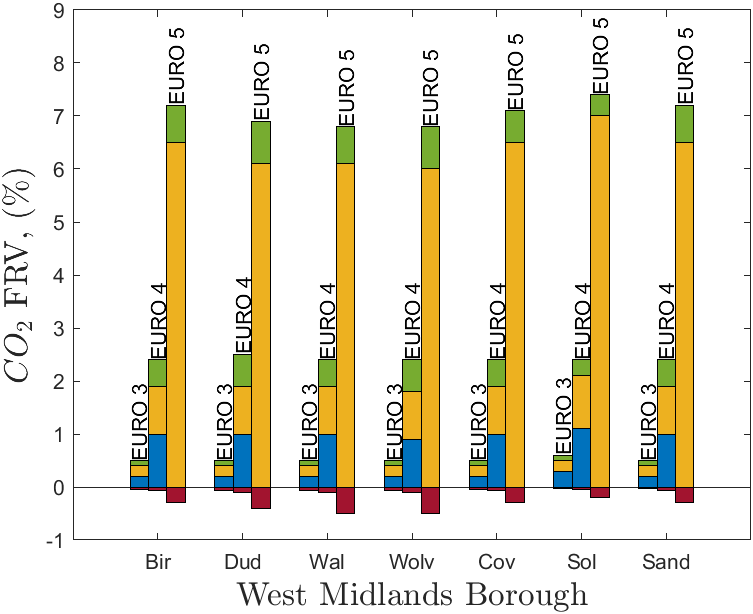   1. CO2 | 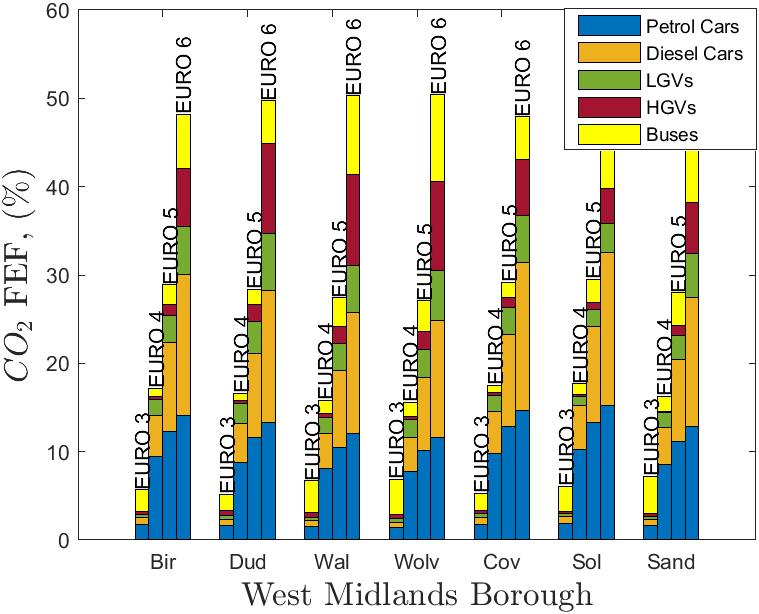 |
| 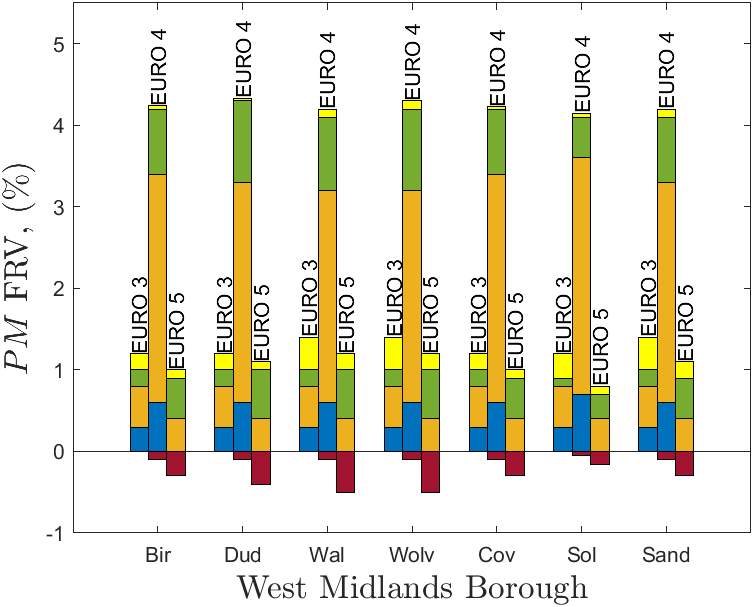   1. PM | 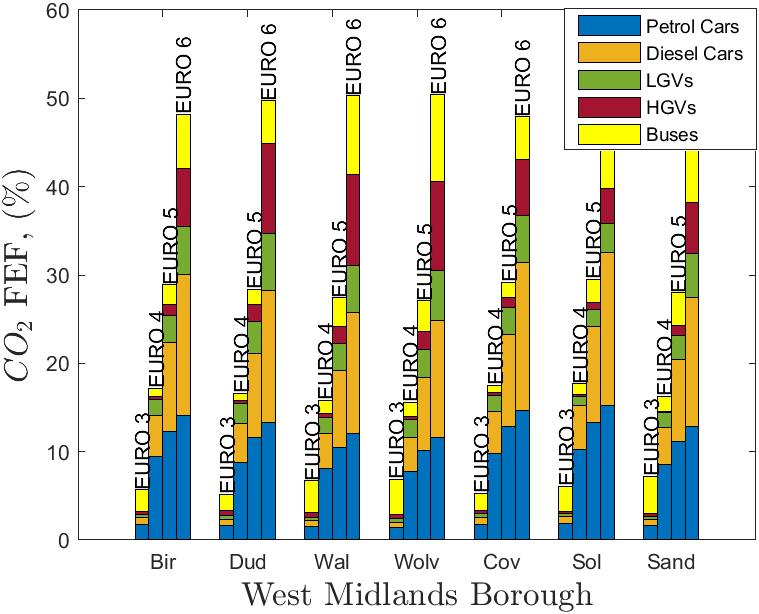 |
| Figure S4. The effect of fleet renovation on rural road emissions of (a) NOx, (b) CO2, and (c) PM in West Midlands boroughs. In the y-axis, (%) is based on the total fleet emission. | |

1. Corresponding author, Email. [f.pope@bham.ac.uk](mailto:f.pope@bham.ac.uk) [↑](#footnote-ref-1)
